# Supplementary material
Source: PubMed Central journal article supplement (PMC3209158)
Supplement: supp_77.21.7715_AEM05845-11_sup01.pdf [file supp_77.21.7715_AEM05845-11_sup01.pdf]

| Root type | N° strain | Blast results               | Affiliation                                                                             | Max score            | Similarity |
|-----------|-----------|-----------------------------|-----------------------------------------------------------------------------------------|----------------------|------------|
| juv       | 924       | <a href="#">NR_028859.1</a> | Herbaspirillum lusitanum strain P6-12. 16S ribosomal RNA, complete sequence             | <a href="#">2372</a> | 100%       |
| juv       | 925       | <a href="#">HQ267096.1</a>  | Ralstonia pickettii strain QL-A6 16S ribosomal RNA gene, partial sequence               | <a href="#">2392</a> | 100%       |
| juv       | 926       | <a href="#">AB271048.1</a>  | Microbacterium ginsengisoli gene for 16S rRNA, partial sequence                         | <a href="#">2379</a> | 100%       |
| juv       | 927       | <a href="#">GQ283907.1</a>  | Burkholderia cepacia strain 2EJ5. 16S ribosomal RNA gene, partial sequence              | <a href="#">2398</a> | 100%       |
| juv       | 929       | <a href="#">AF510387.1</a>  | Rhizobium sp. Phr-9 16S ribosomal RNA gene, partial sequence                            | <a href="#">2307</a> | 100%       |
| juv       | 930       | <a href="#">HM776705.1</a>  | Flavobacterium sp. DCY54. 16S ribosomal RNA gene, partial sequence                      | <a href="#">2383</a> | 100%       |
| juv       | 935       | <a href="#">EU219865.1</a>  | Burkholderia sp. WSM3937. 16S ribosomal RNA gene, partial sequence                      | <a href="#">2305</a> | 100%       |
| juv       | 938       | <a href="#">AF408997.1</a>  | Burkholderia sp. Ellin155. 16S ribosomal RNA gene, partial sequence                     | <a href="#">2340</a> | 100%       |
| juv       | 940       | <a href="#">AB271048.1</a>  | Microbacterium ginsengisoli gene for 16S rRNA, partial sequence                         | <a href="#">2368</a> | 100%       |
| juv       | 941       | <a href="#">AB271048.1</a>  | Microbacterium ginsengisoli gene for 16S rRNA, partial sequence                         | <a href="#">2379</a> | 100%       |
| juv       | 947       | <a href="#">AF408980.1</a>  | Burkholderia sp. Ellin138. 16S ribosomal RNA gene, partial sequence                     | <a href="#">2410</a> | 100%       |
| juv       | 949       | <a href="#">HQ267096.1</a>  | Ralstonia pickettii strain QL-A6 16S ribosomal RNA gene, partial sequence               | <a href="#">2398</a> | 100%       |
| juv       | 952       | <a href="#">HQ267096.1</a>  | Ralstonia pickettii strain QL-A6 16S ribosomal RNA gene, partial sequence               | <a href="#">2398</a> | 100%       |
| juv       | 954       | <a href="#">HQ267096.1</a>  | Ralstonia pickettii strain QL-A6 16S ribosomal RNA gene, partial sequence               | <a href="#">2409</a> | 100%       |
| juv       | 957       | <a href="#">AF408980.1</a>  | Burkholderia sp. Ellin138. 16S ribosomal RNA gene, partial sequence                     | <a href="#">2396</a> | 100%       |
| juv       | 958       | <a href="#">HQ267096.1</a>  | Ralstonia pickettii strain QL-A6 16S ribosomal RNA gene, partial sequence               | <a href="#">2398</a> | 100%       |
| juv       | 963       | <a href="#">NR_026373.1</a> | Sphingomonas pruni strain IFO 15498. 16S ribosomal RNA, partial sequence                | <a href="#">2320</a> | 100%       |
| juv       | 964       | <a href="#">HM776705.1</a>  | Flavobacterium sp. DCY54. 16S ribosomal RNA gene, partial sequence                      | <a href="#">2146</a> | 99%        |
| juv       | 965       | <a href="#">DQ100062.1</a>  | Rhizobium sp. CCB4U 43060. 16S ribosomal RNA gene, partial sequence                     | <a href="#">2206</a> | 100%       |
| juv       | 966       | <a href="#">AF408980.1</a>  | Burkholderia sp. Ellin138. 16S ribosomal RNA gene, partial sequence                     | <a href="#">2403</a> | 100%       |
| juv       | 968       | <a href="#">HQ267096.1</a>  | Ralstonia pickettii strain QL-A6 16S ribosomal RNA gene, partial sequence               | <a href="#">2409</a> | 100%       |
| juv       | 971       | <a href="#">EU723093.1</a>  | Sphingobacteriaceae bacterium kmd. 028. 16S ribosomal RNA gene, partial sequence        | <a href="#">1406</a> | 99%        |
| juv       | 973       | <a href="#">NR_028859.1</a> | Herbaspirillum lusitanum strain P6-12. 16S ribosomal RNA, complete sequence             | <a href="#">2401</a> | 100%       |
| juv       | 974       | <a href="#">AF408980.1</a>  | Burkholderia sp. Ellin138. 16S ribosomal RNA gene, partial sequence                     | <a href="#">2410</a> | 100%       |
| juv       | 976       | <a href="#">AF408997.1</a>  | Burkholderia sp. Ellin155. 16S ribosomal RNA gene, partial sequence                     | <a href="#">2346</a> | 100%       |
| juv       | 977       | <a href="#">AF408997.1</a>  | Burkholderia sp. Ellin155. 16S ribosomal RNA gene, partial sequence                     | <a href="#">2294</a> | 100%       |
| juv       | 978       | <a href="#">HQ407240.1</a>  | Enterobacter amnigenus strain E63. 16S ribosomal RNA gene, partial sequence             | <a href="#">2410</a> | 100%       |
| juv       | 981       | <a href="#">GQ416874.1</a>  | Uncultured Stenotrophomonas sp. clone F1jun.8. 16S ribosomal RNA gene, partial sequence | <a href="#">2411</a> | 100%       |
| juv       | 982       | <a href="#">AB271048.1</a>  | Microbacterium ginsengisoli gene for 16S rRNA, partial sequence                         | <a href="#">2279</a> | 100%       |
| juv       | 985       | <a href="#">AY486382.1</a>  | Acinetobacter sp. AU3560. 16S ribosomal RNA gene, partial sequence                      | <a href="#">2407</a> | 100%       |
| juv       | 988       | <a href="#">AF408997.1</a>  | Burkholderia sp. Ellin155. 16S ribosomal RNA gene, partial sequence                     | <a href="#">2357</a> | 100%       |
| juv       | 990       | <a href="#">EU013944.1</a>  | Wautersia sp. BFXJ-6. 16S ribosomal RNA gene, partial sequence                          | <a href="#">1522</a> | 100%       |
| juv       | 991       | <a href="#">GU569157.1</a>  | Uncultured Pantoea sp. clone UBXB45. 16S ribosomal RNA gene, partial sequence           | <a href="#">2405</a> | 100%       |
| juv       | 992       | <a href="#">GU201545.1</a>  | Uncultured Bordetella sp. clone FT307_A05. 16S ribosomal RNA gene, partial sequence     | <a href="#">2266</a> | 100%       |

|     |     |                             |                                                                                       |      |      |
|-----|-----|-----------------------------|---------------------------------------------------------------------------------------|------|------|
| juv | 993 | <a href="#">HQ267096.1</a>  | Ralstonia pickettii strain QL-A6 16S ribosomal RNA gene, partial sequence             | 2409 | 100% |
| juv | 994 | <a href="#">HQ267096.1</a>  | Ralstonia pickettii strain QL-A6 16S ribosomal RNA gene, partial sequence             | 2409 | 100% |
| juv | 998 | <a href="#">HM627214.1</a>  | Mucilaginibacter sp. GG-w14 16S ribosomal RNA gene, partial sequence                  | 2076 | 99%  |
| juv | 999 | <a href="#">AF408980.1</a>  | Burkholderia sp. Ellin138 16S ribosomal RNA gene, partial sequence                    | 2401 | 100% |
| mat | 838 | <a href="#">AF408980.1</a>  | Burkholderia sp. Ellin138 16S ribosomal RNA gene, partial sequence                    | 2410 | 100% |
| mat | 840 | <a href="#">AF408980.1</a>  | Burkholderia sp. Ellin138 16S ribosomal RNA gene, partial sequence                    | 2390 | 100% |
| mat | 843 | <a href="#">AF408980.1</a>  | Burkholderia sp. Ellin138 16S ribosomal RNA gene, partial sequence                    | 2331 | 100% |
| mat | 847 | <a href="#">AB271048.1</a>  | Burkholderia sp. Ellin138 16S ribosomal RNA gene, partial sequence                    | 2374 | 100% |
| mat | 850 | <a href="#">AB271048.1</a>  | Microbacterium ginsengisoli gene for 16S rRNA, partial sequence                       | 2346 | 99%  |
| mat | 852 | <a href="#">FJ784125.1</a>  | Leifsonia sp. L89 16S ribosomal RNA gene, partial sequence                            | 2372 | 100% |
| mat | 856 | <a href="#">HQ267096.1</a>  | Ralstonia pickettii strain QL-A6 16S ribosomal RNA gene, partial sequence             | 2361 | 100% |
| mat | 857 | <a href="#">HM755596.1</a>  | Acinetobacter sp. C-S-PDA7 16S ribosomal RNA gene, partial sequence                   | 1890 | 99%  |
| mat | 858 | <a href="#">FJ784125.1</a>  | Leifsonia sp. L89 16S ribosomal RNA gene, partial sequence                            | 2372 | 100% |
| mat | 859 | <a href="#">AF408980.1</a>  | Burkholderia sp. Ellin138 16S ribosomal RNA gene, partial sequence                    | 2396 | 100% |
| mat | 860 | <a href="#">AB271048.1</a>  | Microbacterium ginsengisoli gene for 16S rRNA, partial sequence                       | 2385 | 100% |
| mat | 863 | <a href="#">AB271048.1</a>  | Microbacterium ginsengisoli gene for 16S rRNA, partial sequence                       | 2379 | 100% |
| mat | 869 | <a href="#">AB271048.1</a>  | Microbacterium ginsengisoli gene for 16S rRNA, partial sequence                       | 2316 | 100% |
| mat | 870 | <a href="#">FN668008.1</a>  | Microbacterium ginsengisoli partial 16S rRNA gene, strain SE33c                       | 1134 | 99%  |
| mat | 871 | <a href="#">EJ184088.1</a>  | Rhizobium sp. PSB12 16S ribosomal RNA gene, partial sequence                          | 2229 | 99%  |
| mat | 873 | <a href="#">GU385802.1</a>  | Burkholderia sp. BS115 16S ribosomal RNA gene, partial sequence                       | 1199 | 100% |
| mat | 874 | <a href="#">EJ184088.1</a>  | Rhizobium sp. PSB12 16S ribosomal RNA gene, partial sequence                          | 2302 | 100% |
| mat | 876 | <a href="#">HM352343.1</a>  | Burkholderia sp. CmMC2 16S ribosomal RNA gene, partial sequence                       | 1129 | 100% |
| mat | 878 | <a href="#">AB586071.1</a>  | Burkholderia sp. JCM 20553 gene for 16S rRNA, partial sequence                        | 2398 | 100% |
| mat | 879 | <a href="#">GU144367.1</a>  | Burkholderia fungorum strain UFLA04-136 16S ribosomal RNA gene, partial sequence      | 2403 | 100% |
| mat | 880 | <a href="#">AF408980.1</a>  | Burkholderia sp. Ellin138 16S ribosomal RNA gene, partial sequence                    | 2388 | 100% |
| mat | 881 | <a href="#">AF408997.1</a>  | Burkholderia sp. Ellin155 16S ribosomal RNA gene, partial sequence                    | 2283 | 100% |
| mat | 883 | <a href="#">JN084155.1</a>  | Bacillus aryabhatai strain Y8 16S ribosomal RNA gene, partial sequence                | 1153 | 100% |
| mat | 885 | <a href="#">AF408980.1</a>  | Burkholderia sp. Ellin138 16S ribosomal RNA gene, partial sequence                    | 2392 | 100% |
| mat | 888 | <a href="#">AB586071.1</a>  | Burkholderia sp. JCM 20553 gene for 16S rRNA, partial sequence                        | 2390 | 100% |
| mat | 889 | <a href="#">AB586071.1</a>  | Burkholderia sp. JCM 20553 gene for 16S rRNA, partial sequence                        | 2407 | 100% |
| mat | 890 | <a href="#">AB586071.1</a>  | Burkholderia sp. JCM 20553 gene for 16S rRNA, partial sequence                        | 2407 | 100% |
| mat | 895 | <a href="#">AB271048.1</a>  | Microbacterium ginsengisoli gene for 16S rRNA, partial sequence                       | 2392 | 100% |
| mat | 896 | <a href="#">NR_026373.1</a> | Sphingomonas pruni strain IFO 15498 16S ribosomal RNA, partial sequence >emb Y09637.1 | 2274 | 99%  |
| mat | 899 | <a href="#">AB586071.1</a>  | Burkholderia sp. JCM 20553 gene for 16S rRNA, partial sequence                        | 2327 | 100% |
| mat | 904 | <a href="#">GU479373.1</a>  | Mesorhizobium sp. Mezo1 16S ribosomal RNA gene, partial sequence                      | 2239 | 100% |

|     |      |                             |                                                                                  |      |      |
|-----|------|-----------------------------|----------------------------------------------------------------------------------|------|------|
| mat | 906  | <a href="#">AB586071.1</a>  | Burkholderia sp. JCM 20553 gene for 16S rRNA, partial sequence                   | 2398 | 100% |
| mat | 916  | <a href="#">AB265160.1</a>  | Mesorhizobium sp. E14 gene for 16S ribosomal RNA, partial sequence               | 2244 | 100% |
| mat | 918  | <a href="#">FN668008.1</a>  | Microbacterium ginsengisoli partial.16S rRNA gene, strain SE33c                  | 1267 | 99%  |
| sen | 1000 | <a href="#">HQ407248.1</a>  | Staphylococcus warneri strain G72 16S ribosomal RNA gene, partial sequence       | 2425 | 100% |
| sen | 1001 | <a href="#">GU569157.1</a>  | Uncultured Pantoea sp. clone UBXB45 16S ribosomal RNA gene, partial sequence     | 2385 | 100% |
| sen | 1005 | <a href="#">HQ407248.1</a>  | Staphylococcus warneri strain G72 16S ribosomal RNA gene, partial sequence       | 2431 | 100% |
| sen | 1006 | <a href="#">HQ236088.1</a>  | Pantoea agglomerans strain TBT3-10 16S ribosomal RNA gene, partial sequence      | 2383 | 100% |
| sen | 1007 | <a href="#">HQ407248.1</a>  | Staphylococcus warneri strain G72 16S ribosomal RNA gene, partial sequence       | 2436 | 100% |
| sen | 1008 | <a href="#">AF408980.1</a>  | Burkholderia sp. Ellin138 16S ribosomal RNA gene, partial sequence               | 2405 | 100% |
| sen | 1010 | <a href="#">GU144367.1</a>  | Burkholderia fungorum strain UFLA04-136 16S ribosomal RNA gene, partial sequence | 2403 | 100% |
| sen | 1015 | <a href="#">AB586071.1</a>  | Burkholderia sp. JCM 20553 gene for 16S rRNA, partial sequence                   | 2407 | 100% |
| sen | 1016 | <a href="#">AF408980.1</a>  | Burkholderia sp. Ellin138 16S ribosomal RNA gene, partial sequence               | 2405 | 100% |
| sen | 1017 | <a href="#">AF408980.1</a>  | Burkholderia sp. Ellin138 16S ribosomal RNA gene, partial sequence               | 2410 | 100% |
| sen | 1018 | <a href="#">HQ407248.1</a>  | Staphylococcus warneri strain G72 16S ribosomal RNA gene, partial sequence       | 2425 | 100% |
| sen | 1019 | <a href="#">AF408980.1</a>  | Burkholderia sp. Ellin138 16S ribosomal RNA gene, partial sequence               | 2410 | 100% |
| sen | 1020 | <a href="#">AF408980.1</a>  | Burkholderia sp. Ellin138 16S ribosomal RNA gene, partial sequence               | 2405 | 100% |
| sen | 1021 | <a href="#">AB586071.1</a>  | Burkholderia sp. JCM 20553 gene for 16S rRNA, partial sequence                   | 2386 | 100% |
| sen | 1023 | <a href="#">AB771048.1</a>  | Microbacterium ginsengisoli gene for 16S rRNA, partial sequence                  | 2374 | 100% |
| sen | 1024 | <a href="#">AF408997.1</a>  | Burkholderia sp. Ellin155 16S ribosomal RNA gene, partial sequence               | 2351 | 100% |
| sen | 1025 | <a href="#">NR_026373.1</a> | Sphingomonas pruni strain IFO 15498 16S ribosomal RNA, partial sequence          | 2326 | 100% |
| sen | 1026 | <a href="#">FJ536902.1</a>  | Uncultured Dyella sp. clone DMS32 16S ribosomal RNA gene, partial sequence       | 2410 | 100% |
| sen | 1027 | <a href="#">AB271048.1</a>  | Microbacterium ginsengisoli gene for 16S rRNA, partial sequence                  | 2385 | 100% |
| sen | 1030 | <a href="#">NR_026373.1</a> | Sphingomonas pruni strain IFO 15498 16S ribosomal RNA, partial sequence          | 2320 | 100% |
| sen | 1033 | <a href="#">HQ407248.1</a>  | Staphylococcus warneri strain G72 16S ribosomal RNA gene, partial sequence       | 2436 | 100% |
| sen | 1036 | <a href="#">AF408980.1</a>  | Burkholderia sp. Ellin138 16S ribosomal RNA gene, partial sequence               | 2411 | 100% |
| sen | 1038 | <a href="#">AF408997.1</a>  | Burkholderia sp. Ellin155 16S ribosomal RNA gene, partial sequence               | 2357 | 100% |
| sen | 1039 | <a href="#">HQ407248.1</a>  | Staphylococcus warneri strain G72 16S ribosomal RNA gene, partial sequence       | 2425 | 100% |
| sen | 1041 | <a href="#">AB264798.1</a>  | Chitinophaga ginsengisegetis gene for 16S rRNA, partial sequence                 | 2346 | 100% |
| sen | 1042 | <a href="#">AF408980.1</a>  | Burkholderia sp. Ellin138 16S ribosomal RNA gene, partial sequence               | 2410 | 100% |
| sen | 1043 | <a href="#">AB586071.1</a>  | Burkholderia sp. Ellin138 16S ribosomal RNA gene, partial sequence               | 2405 | 100% |
| sen | 1044 | <a href="#">AB586071.1</a>  | Burkholderia sp. JCM 20553 gene for 16S rRNA, partial sequence                   | 2398 | 100% |
| sen | 1044 | <a href="#">AB586071.1</a>  | Burkholderia sp. JCM 20553 gene for 16S rRNA, partial sequence                   | 2407 | 100% |
| sen | 1045 | <a href="#">AF408980.1</a>  | Burkholderia sp. Ellin138 16S ribosomal RNA gene, partial sequence               | 2411 | 100% |
| sen | 1046 | <a href="#">HQ407248.1</a>  | Staphylococcus warneri strain G72 16S ribosomal RNA gene, partial sequence       | 2431 | 100% |
| sen | 1047 | <a href="#">AF408980.1</a>  | Burkholderia sp. Ellin138 16S ribosomal RNA gene, partial sequence               | 2411 | 100% |

|     |      |                   |                                                                            |             |      |
|-----|------|-------------------|----------------------------------------------------------------------------|-------------|------|
| sen | 1049 | <u>AF408980.1</u> | Burkholderia sp. Ellin138 16S ribosomal RNA gene, partial sequence         | <u>2401</u> | 100% |
| sen | 1050 | <u>HQ407248.1</u> | Staphylococcus warneri strain G72 16S ribosomal RNA gene, partial sequence | <u>2431</u> | 100% |
| sen | 1052 | <u>HQ267096.1</u> | Ralstonia pickettii strain QL-A6 16S ribosomal RNA gene, partial sequence  | <u>2409</u> | 100% |
| sen | 1055 | <u>AB586071.1</u> | Burkholderia sp. JCM 20553 gene for 16S rRNA, partial sequence             | <u>2407</u> | 100% |
| sen | 1056 | <u>HQ267096.1</u> | Ralstonia pickettii strain QL-A6 16S ribosomal RNA gene, partial sequence  | <u>2322</u> | 100% |
| sen | 1057 | <u>AF408980.1</u> | Burkholderia sp. Ellin138 16S ribosomal RNA gene, partial sequence         | <u>2411</u> | 100% |
| sen | 1058 | <u>AB271048.1</u> | Microbacterium ginsengisoli gene for 16S rRNA, partial sequence            | <u>2366</u> | 100% |
| sen | 1060 | <u>AF408980.1</u> | Burkholderia sp. Ellin138 16S ribosomal RNA gene, partial sequence         | <u>2411</u> | 100% |
| sen | 1061 | <u>AF408980.1</u> | Burkholderia sp. Ellin138 16S ribosomal RNA gene, partial sequence         | <u>2411</u> | 100% |
| sen | 1062 | <u>AF408980.1</u> | Burkholderia sp. Ellin138 16S ribosomal RNA gene, partial sequence         | <u>2403</u> | 100% |
| sen | 1065 | <u>AF408980.1</u> | Burkholderia sp. Ellin138 16S ribosomal RNA gene, partial sequence         | <u>2411</u> | 100% |
| sen | 1066 | <u>AF408997.1</u> | Burkholderia sp. Ellin155 16S ribosomal RNA gene, partial sequence         | <u>2362</u> | 100% |
| sen | 1068 | <u>HQ407248.1</u> | Staphylococcus warneri strain G72 16S ribosomal RNA gene, partial sequence | <u>2431</u> | 100% |
| sen | 1069 | <u>AF408980.1</u> | Burkholderia sp. Ellin138 16S ribosomal RNA gene, partial sequence         | <u>2410</u> | 100% |
| sen | 1071 | <u>AF408980.1</u> | Burkholderia sp. Ellin138 16S ribosomal RNA gene, partial sequence         | <u>2411</u> | 100% |
| sen | 1072 | <u>FJ536902.1</u> | Uncultured Dyella sp. clone DMS32 16S ribosomal RNA gene, partial sequence | <u>2410</u> | 100% |
| sen | 1073 | <u>AY238504.1</u> | Burkholderia sp. 54 16S ribosomal RNA gene, partial sequence               | <u>2410</u> | 100% |
| sen | 1074 | <u>AB264798.1</u> | Chitinophaga ginsengisegetis gene for 16S rRNA, partial sequence           | <u>2222</u> | 100% |
| sen | 1075 | <u>AF408980.1</u> | Burkholderia sp. Ellin138 16S ribosomal RNA gene, partial sequence         | <u>2405</u> | 100% |
| sen | 1077 | <u>AF408997.1</u> | Burkholderia sp. Ellin155 16S ribosomal RNA gene, partial sequence         | <u>1042</u> | 100% |
