# Supplementary material
Source: PubMed Central journal article supplement (PMC3209158)
Supplement: supp_77.21.7715_AEM05845-11_sup02.pdf [file supp_77.21.7715_AEM05845-11_sup02.pdf]

| Root type | clone N° | Accession                   | Affiliation                                                                        | Max score            | Similarity |
|-----------|----------|-----------------------------|------------------------------------------------------------------------------------|----------------------|------------|
| juv       | 3        | <a href="#">NR_026373.1</a> | Sphingomonas pruni strain IFO 15498 16S ribosomal RNA                              | <a href="#">2326</a> | 100%       |
| juv       | 7        | <a href="#">HM107184.1</a>  | Burkholderia sp. CCBAU 25371 16S ribosomal RNA gene, partial sequence              | <a href="#">2388</a> | 100%       |
| juv       | 35       | <a href="#">AM412138.1</a>  | Massilia sp. P-105 partial 16S rRNA gene, strain P-105                             | <a href="#">2285</a> | 100%       |
| juv       | 46       | <a href="#">AF164052.2</a>  | Herbaspirillum sp. BA14 16S ribosomal RNA gene, partial sequence                   | <a href="#">2385</a> | 100%       |
| juv       | 50       | <a href="#">HM852118.1</a>  | Rhizobium lusitanum strain P5-6 16S ribosomal RNA gene, partial sequence           | <a href="#">2335</a> | 100%       |
| juv       | 68       | <a href="#">AF408980.1</a>  | Burkholderia sp. Ellin138 16S ribosomal RNA gene, partial sequence                 | <a href="#">2375</a> | 100%       |
| juv       | 80       | <a href="#">AF164052.2</a>  | Herbaspirillum sp. BA14 16S ribosomal RNA gene, partial sequence                   | <a href="#">2396</a> | 100%       |
| juv       | 83       | <a href="#">AF164052.2</a>  | Herbaspirillum sp. BA14 16S ribosomal RNA gene, partial sequence                   | <a href="#">2379</a> | 100%       |
| juv       | 109      | <a href="#">AF164052.2</a>  | Herbaspirillum sp. BA14 16S ribosomal RNA gene, partial sequence                   | <a href="#">2385</a> | 100%       |
| juv       | 110      | <a href="#">DQ150565.1</a>  | Herbaspirillum hiltneri strain N9 16S ribosomal RNA gene, partial sequence         | <a href="#">2224</a> | 100%       |
| juv       | 111      | <a href="#">HQ005421.1</a>  | Variovorax paradoxus strain BS064 16S ribosomal RNA gene, partial sequence         | <a href="#">2409</a> | 100%       |
| juv       | 116      | <a href="#">AM412138.1</a>  | Massilia sp. P-105 partial 16S rRNA gene, strain P-105                             | <a href="#">2296</a> | 100%       |
| juv       | 125      | <a href="#">DQ005909.2</a>  | Telluria mixta 16S ribosomal RNA gene, partial sequence                            | <a href="#">2272</a> | 100%       |
| juv       | 130      | <a href="#">GU332616.1</a>  | Duganella sp. AT1-1 16S ribosomal RNA gene, partial sequence                       | <a href="#">2357</a> | 99%        |
| juv       | 144      | <a href="#">AF164052.2</a>  | Herbaspirillum sp. BA14 16S ribosomal RNA gene, partial sequence                   | <a href="#">2390</a> | 100%       |
| juv       | 161      | <a href="#">DQ005909.2</a>  | Telluria mixta 16S ribosomal RNA gene, partial sequence                            | <a href="#">2290</a> | 100%       |
| juv       | 186      | <a href="#">DQ005909.2</a>  | Telluria mixta 16S ribosomal RNA gene, partial sequence                            | <a href="#">2263</a> | 100%       |
| juv       | 219      | <a href="#">AF364861.1</a>  | Herbaspirillum sp. BA17 16S ribosomal RNA gene, partial sequence                   | <a href="#">2163</a> | 100%       |
| juv       | 236      | <a href="#">AF164052.2</a>  | Herbaspirillum sp. BA14 16S ribosomal RNA gene, partial sequence                   | <a href="#">2396</a> | 100%       |
| juv       | 245      | <a href="#">AF164052.2</a>  | Herbaspirillum sp. BA14 16S ribosomal RNA gene, partial sequence                   | <a href="#">2383</a> | 100%       |
| juv       | 249      | <a href="#">DQ005909.2</a>  | Telluria mixta 16S ribosomal RNA gene, partial sequence                            | <a href="#">2329</a> | 100%       |
| juv       | 263      | <a href="#">HQ22324.1</a>   | Dyella marenensis strain L2 16S ribosomal RNA gene, partial sequence               | <a href="#">2289</a> | 100%       |
| juv       | 279      | <a href="#">HM852118.1</a>  | Rhizobium lusitanum strain P5-6 16S ribosomal RNA gene, partial sequence           | <a href="#">2318</a> | 100%       |
| juv       | 281      | <a href="#">AF164052.2</a>  | Herbaspirillum sp. BA14 16S ribosomal RNA gene, partial sequence                   | <a href="#">2368</a> | 100%       |
| juv       | 282      | <a href="#">EU073130.1</a>  | Naxibacter sp. X16-7 16S ribosomal RNA gene, partial sequence                      | <a href="#">2246</a> | 100%       |
| juv       | 283      | <a href="#">DQ005909.2</a>  | Telluria mixta 16S ribosomal RNA gene, partial sequence                            | <a href="#">2307</a> | 100%       |
| juv       | 290      | <a href="#">DQ005909.2</a>  | Telluria mixta 16S ribosomal RNA gene, partial sequence                            | <a href="#">2274</a> | 100%       |
| juv       | 298      | <a href="#">DQ005909.2</a>  | Telluria mixta 16S ribosomal RNA gene, partial sequence                            | <a href="#">2257</a> | 100%       |
| juv       | 301      | <a href="#">AF408980.1</a>  | Burkholderia sp. Ellin138 16S ribosomal RNA gene, partial sequence                 | <a href="#">2399</a> | 100%       |
| juv       | 316      | <a href="#">AF408980.1</a>  | Burkholderia sp. Ellin138 16S ribosomal RNA gene, partial sequence                 | <a href="#">2405</a> | 100%       |
| juv       | 323      | <a href="#">EU440651.1</a>  | Uncultured Pelomonas sp. clone Plot17-F03 16S ribosomal RNA gene, partial sequence | <a href="#">2102</a> | 100%       |
| juv       | 330      | <a href="#">HM062090.1</a>  | Uncultured Acidobacteria bacterium clone KBS                                       | <a href="#">2228</a> | 100%       |
| juv       | 335      | <a href="#">HQ267096.1</a>  | Ralstonia pickettii strain QL-A6 16S ribosomal RNA gene, partial sequence          | <a href="#">2392</a> | 100%       |

|     |     |            |                                                                                       |      |      |
|-----|-----|------------|---------------------------------------------------------------------------------------|------|------|
| juv | 343 | AB480711.2 | Leptothrix sp. PN15D gene for 16S rRNA, partial sequence                              | 2300 | 100% |
| juv | 356 | HM107184.1 | Burkholderia sp. CCBau 25371 16S ribosomal RNA gene, partial sequence                 | 2386 | 100% |
| juv | 375 | AF164052.2 | Herbaspirillum sp. BA14 16S ribosomal RNA gene, partial sequence                      | 2379 | 100% |
| juv | 395 | AF164052.2 | Herbaspirillum sp. BA14 16S ribosomal RNA gene, partial sequence                      | 2396 | 100% |
| juv | 396 | EU024154.1 | Burkholderia graminis strain CIP 106649 16S ribosomal RNA gene, partial sequence      | 2187 | 100% |
| juv | 398 | FJ889342.1 | Uncultured Xanthomonadaceae bacterium clone                                           | 2350 | 100% |
| juv | 407 | AF164052.2 | Herbaspirillum sp. BA14 16S ribosomal RNA gene, partial sequence                      | 2385 | 100% |
| juv | 413 | GU070680.1 | Uncultured Ralstonia sp. clone GB62 16S ribosomal RNA gene, partial sequence          | 2106 | 91%  |
| juv | 417 | AM412138.1 | Massilia sp. P-105 partial 16S rRNA gene, strain P-105                                | 2283 | 100% |
| juv | 420 | GU201545.1 | Uncultured Bordetella sp. clone FT307_A05 16S ribosomal RNA gene, partial sequence    | 2239 | 100% |
| juv | 423 | AB542414.1 | Mesorhizobium sp. TSA41s gene for 16S ribosomal RNA, partial sequence, strain: TSA41s | 2337 | 100% |
| juv | 433 | AB545620.1 | Massilia sp. TSO8 gene for 16S ribosomal RNA, partial sequence                        | 2340 | 100% |
| juv | 447 | AM412138.1 | Massilia sp. P-105 partial 16S rRNA gene, strain P-105                                | 2257 | 100% |
| juv | 463 | FR733702.1 | Methylovorus glucosotrophus partial 16S rRNA gene, type strain DSM6874T               | 2183 | 100% |
| juv | 481 | DQ150565.1 | Herbaspirillum hiltneri strain N9 16S ribosomal RNA gene, partial sequence            | 2383 | 100% |
| juv | 485 | HM107184.1 | Burkholderia sp. CCBau 25371 16S ribosomal RNA gene, partial sequence                 | 2398 | 100% |
| juv | 491 | AF164052.2 | Herbaspirillum sp. BA14 16S ribosomal RNA gene, partial sequence                      | 2372 | 100% |
| juv | 492 | AF164052.2 | Herbaspirillum sp. BA14 16S ribosomal RNA gene, partial sequence                      | 2372 | 100% |
| juv | 495 | HM107185.1 | Burkholderia sp. s25 16S ribosomal RNA gene, partial sequence                         | 2313 | 100% |
| juv | 503 | DQ005909.2 | Telluria mixta 16S ribosomal RNA gene, partial sequence                               | 2250 | 100% |
| juv | 505 | HQ267096.1 | Ralstonia pickettii strain QL-A6 16S ribosomal RNA gene, partial sequence             | 2401 | 100% |
| juv | 521 | AB508890.1 | Azospirillum sp. TSH78 gene for 16S ribosomal RNA, partial sequence                   | 2307 | 99%  |
| juv | 532 | AF164052.2 | Herbaspirillum sp. BA14 16S ribosomal RNA gene, partial sequence                      | 2394 | 100% |
| juv | 540 | AF408997.1 | Burkholderia sp. Ellin155 16S ribosomal RNA gene, partial sequence                    | 2340 | 100% |
| juv | 546 | AF247494.1 | Burkholderia sp. S2.1 16S ribosomal RNA gene, partial sequence                        | 2379 | 100% |
| juv | 560 | AF164052.2 | Herbaspirillum sp. BA14 16S ribosomal RNA gene, partial sequence                      | 2390 | 100% |
| juv | 576 | AB545620.1 | Massilia sp. TSO8 gene for 16S ribosomal RNA, partial sequence                        | 2340 | 100% |
| juv | 586 | DQ005909.2 | Telluria mixta 16S ribosomal RNA gene, partial sequence                               | 2274 | 100% |
| juv | 594 | GU201545.1 | Uncultured Bordetella sp. clone FT307_A05 16S ribosomal RNA gene, partial sequence    | 2250 | 100% |
| juv | 595 | AF164052.2 | Herbaspirillum sp. BA14 16S ribosomal RNA gene, partial sequence                      | 2385 | 99%  |
| juv | 598 | AF164052.2 | Herbaspirillum sp. BA14 16S ribosomal RNA gene, partial sequence                      | 2396 | 100% |
| juv | 602 | GO200828.1 | Massilia sp. M1 16S ribosomal RNA gene, partial sequence                              | 2296 | 100% |
| juv | 606 | GU339286.1 | Pectobacterium cypripedii strain EH59 16S ribosomal RNA gene, partial sequence        | 2392 | 100% |
| juv | 617 | AF164052.2 | Herbaspirillum sp. BA14 16S ribosomal RNA gene, partial sequence                      | 2385 | 100% |
| juv | 618 | AY360547.1 | Uncultured Methylophilaceae bacterium clone 10-3Ba25                                  | 2178 | 100% |

|     |     |            |                                                                                     |      |      |
|-----|-----|------------|-------------------------------------------------------------------------------------|------|------|
| juv | 627 | HM107185.1 | Burkholderia sp. s25 16S ribosomal RNA gene, partial sequence                       | 2320 | 100% |
| juv | 629 | HM107184.1 | Burkholderia sp. CCBAU 25371 16S ribosomal RNA gene, partial sequence               | 2405 | 100% |
| juv | 631 | AB531412.1 | Collimonas sp. III-27 gene for 16S rRNA, partial sequence                           | 2368 | 100% |
| juv | 639 | AF408997.1 | Burkholderia sp. Ellin155 16S ribosomal RNA gene, partial sequence                  | 2340 | 100% |
| juv | 641 | AM745942.1 | Burkholderia sp. R-701 16S rRNA gene, strain R-701                                  | 2407 | 100% |
| juv | 642 | EU399918.1 | Herbaspirillum frisingense strain CAF265 16S ribosomal RNA gene, partial sequence   | 1982 | 100% |
| juv | 647 | DQ005909.2 | Telluria mixta 16S ribosomal RNA gene, partial sequence                             | 2252 | 100% |
| juv | 653 | AF408980.1 | Burkholderia sp. Ellin138 16S ribosomal RNA gene, partial sequence                  | 2405 | 100% |
| juv | 673 | HQ167731.1 | Curvibacter sp. HIME6821 16S ribosomal RNA gene, partial sequence                   | 2314 | 100% |
| juv | 685 | AF408980.1 | Burkholderia sp. Ellin138 16S ribosomal RNA gene, partial sequence                  | 2399 | 100% |
| juv | 701 | AF164052.2 | Herbaspirillum sp. BA14 16S ribosomal RNA gene, partial sequence                    | 2385 | 100% |
| juv | 702 | GU201545.1 | Uncultured Bordetella sp. clone EFT307_A05 16S ribosomal RNA gene, partial sequence | 2233 | 100% |
| juv | 703 | HM107184.1 | Burkholderia sp. CCBAU 25371 16S ribosomal RNA gene, partial sequence               | 2392 | 100% |
| juv | 712 | DQ005909.2 | Telluria mixta 16S ribosomal RNA gene, partial sequence                             | 2285 | 100% |
| juv | 713 | HM107184.1 | Burkholderia sp. CCBAU 25371 16S ribosomal RNA gene, partial sequence               | 2388 | 100% |
| juv | 714 | FJ418697.1 | Mesorhizobium sp. CCBAU 41182 16S ribosomal RNA gene, partial sequence              | 2324 | 100% |
| juv | 718 | EU074181.1 | Rhizobium tropici strain CCBAU 01483 16S ribosomal RNA gene, partial sequence       | 1919 | 100% |
| juv | 732 | DQ150565.1 | Herbaspirillum hiltneri strain N9 16S ribosomal RNA gene, partial sequence          | 2401 | 100% |
| juv | 736 | AB531412.1 | Collimonas sp. III-27 gene for 16S rRNA, partial sequence                           | 2385 | 100% |
| juv | 752 | AF408997.1 | Burkholderia sp. Ellin155 16S ribosomal RNA gene, partial sequence                  | 2324 | 100% |
| juv | 762 | DQ005909.2 | Telluria mixta 16S ribosomal RNA gene, partial sequence                             | 2246 | 100% |
| juv | 765 | AF164052.2 | Herbaspirillum sp. BA14 16S ribosomal RNA gene, partial sequence                    | 2388 | 100% |
| juv | 783 | HM107184.1 | Burkholderia sp. CCBAU 25371 16S ribosomal RNA gene, partial sequence               | 2405 | 100% |
| juv | 793 | AF164052.2 | Herbaspirillum sp. BA14 16S ribosomal RNA gene, partial sequence                    | 2396 | 100% |
| juv | 798 | DQ005909.2 | Telluria mixta 16S ribosomal RNA gene, partial sequence                             | 2279 | 100% |
| juv | 801 | GU569118.1 | Uncultured Variovorax sp. clone JBXB8 16S ribosomal RNA gene, partial sequence      | 2409 | 100% |
| juv | 805 | QQ200828.1 | Massilia sp. M1 16S ribosomal RNA gene, partial sequence                            | 2285 | 100% |
| juv | 806 | HM107185.1 | Burkholderia sp. s25 16S ribosomal RNA gene, partial sequence                       | 2338 | 100% |
| juv | 807 | AF408980.1 | Burkholderia sp. Ellin138 16S ribosomal RNA gene, partial sequence                  | 2410 | 100% |
| juv | 811 | AF408980.1 | Burkholderia sp. Ellin138 16S ribosomal RNA gene, partial sequence                  | 2411 | 100% |
| juv | 812 | DQ005909.2 | Telluria mixta 16S ribosomal RNA gene, partial sequence                             | 2290 | 100% |
| juv | 818 | AF164052.2 | Herbaspirillum sp. BA14 16S ribosomal RNA gene, partial sequence                    | 2401 | 100% |
| juv | 822 | AB545621.1 | Azospirillum sp. TS09 gene for 16S ribosomal RNA, partial sequence                  | 2298 | 100% |
| juv | 824 | AM411925.1 | Rhizobium sp. P-26 partial 16S rRNA gene, strain P-26                               | 2134 | 98%  |
| juv | 827 | HM856564.1 | Uncultured Methylophilaceae bacterium clone YL203 16S ribosomal RNA gene            | 1808 | 100% |

|     |      |                            |                                                                                          |      |      |
|-----|------|----------------------------|------------------------------------------------------------------------------------------|------|------|
| juv | 829  | <a href="#">HM107185.1</a> | Burkholderia sp. s25 16S ribosomal RNA gene, partial sequence                            | 2405 | 100% |
| juv | 842  | <a href="#">AY18222.1</a>  | Azospirillum sp. Matz-1a 16S ribosomal RNA gene, partial sequence                        | 1825 | 100% |
| juv | 856  | <a href="#">AM412138.1</a> | Massilia sp. P-105 partial 16S rRNA gene, strain P-105                                   | 2313 | 100% |
| juv | 858  | <a href="#">AF164052.2</a> | Herbaspirillum sp. BA14 16S ribosomal RNA gene, partial sequence                         | 2379 | 100% |
| juv | 860  | <a href="#">AY360547.1</a> | Uncultured Methylophilaceae bacterium clone 10-3Ba25                                     | 2189 | 100% |
| juv | 861  | <a href="#">HM107184.1</a> | Burkholderia sp. CCBAU 25371 16S ribosomal RNA gene, partial sequence                    | 2383 | 100% |
| juv | 865  | <a href="#">GU201545.1</a> | Uncultured Bordetella sp. clone FT307_A05 16S ribosomal RNA gene, partial sequence       | 2233 | 100% |
| juv | 868  | <a href="#">AF247494.1</a> | Burkholderia sp. S2.1 16S ribosomal RNA gene, partial sequence                           | 2379 | 100% |
| juv | 883  | <a href="#">FJ889345.1</a> | Uncultured Dokdonella sp. clone Plot18-2F04 16S ribosomal RNA gene, partial sequence     | 2302 | 100% |
| juv | 887  | <a href="#">AB545620.1</a> | Massilia sp. TSO8 gene for 16S ribosomal RNA, partial sequence                           | 2340 | 100% |
| juv | 899  | <a href="#">FJ603036.1</a> | Burkholderia sp. ny10 16S ribosomal RNA gene, partial sequence                           | 2366 | 100% |
| juv | 901  | <a href="#">AF526939.1</a> | Uncultured Bradyrhizobium sp. clone 81-24 16S ribosomal RNA (rrn) gene, partial sequence | 2274 | 100% |
| juv | 906  | <a href="#">EU962139.1</a> | Uncultured Herbaspirillum sp. clone 10 16S ribosomal RNA gene, partial sequence          | 2056 | 100% |
| juv | 908  | <a href="#">AF408980.1</a> | Burkholderia sp. Ellin138 16S ribosomal RNA gene, partial sequence                       | 2405 | 100% |
| juv | 919  | <a href="#">AB545621.1</a> | Azospirillum sp. TSO9 gene for 16S ribosomal RNA, partial sequence                       | 2303 | 100% |
| juv | 922  | <a href="#">HM852118.1</a> | Rhizobium lusitanum strain P5-6 16S ribosomal RNA gene, partial sequence                 | 2329 | 100% |
| juv | 927  | <a href="#">HM107185.1</a> | Burkholderia sp. s25 16S ribosomal RNA gene, partial sequence                            | 2326 | 100% |
| juv | 929  | <a href="#">HM852118.1</a> | Rhizobium lusitanum strain P5-6 16S ribosomal RNA gene, partial sequence                 | 2340 | 100% |
| juv | 935  | <a href="#">AM745942.1</a> | Burkholderia sp. R-701 16S rRNA gene, strain R-701                                       | 2407 | 100% |
| juv | 940  | <a href="#">AF164052.2</a> | Herbaspirillum sp. BA14 16S ribosomal RNA gene, partial sequence                         | 2396 | 100% |
| juv | 944  | <a href="#">AB508890.1</a> | Azospirillum sp. TSH78 gene for 16S ribosomal RNA, partial sequence                      | 2326 | 100% |
| juv | 945  | <a href="#">DQ787329.1</a> | Azospirillum lipoferum strain B22 16S ribosomal RNA gene, partial sequence               | 2292 | 100% |
| juv | 952  | <a href="#">AM745942.1</a> | Burkholderia sp. R-701 16S rRNA gene, strain R-701                                       | 2396 | 100% |
| juv | 953  | <a href="#">AB531412.1</a> | Collimonas sp. III-27 gene for 16S rRNA, partial sequence                                | 2385 | 100% |
| juv | 963  | <a href="#">GQ200828.1</a> | Massilia sp. M1 16S ribosomal RNA gene, partial sequence                                 | 2296 | 100% |
| juv | 971  | <a href="#">AF164052.2</a> | Herbaspirillum sp. BA14 16S ribosomal RNA gene, partial sequence                         | 2379 | 100% |
| juv | 974  | <a href="#">AF164052.2</a> | Herbaspirillum sp. BA14 16S ribosomal RNA gene, partial sequence                         | 2401 | 100% |
| juv | 985  | <a href="#">AF164052.2</a> | Herbaspirillum sp. BA14 16S ribosomal RNA gene, partial sequence                         | 2396 | 100% |
| juv | 995  | <a href="#">AB545620.1</a> | Massilia sp. TSO8 gene for 16S ribosomal RNA, partial sequence                           | 2351 | 100% |
| juv | 1003 | <a href="#">HM852118.1</a> | Rhizobium lusitanum strain P5-6 16S ribosomal RNA gene, partial sequence                 | 2340 | 100% |
| juv | 1013 | <a href="#">AB545620.1</a> | Massilia sp. TSO8 gene for 16S ribosomal RNA, partial sequence                           | 2335 | 100% |
| juv | 1014 | <a href="#">HM107185.1</a> | Burkholderia sp. s25 16S ribosomal RNA gene, partial sequence                            | 2405 | 100% |
| juv | 1025 | <a href="#">GU201544.1</a> | Uncultured Bordetella sp. clone FT107_D08 16S ribosomal RNA gene, partial sequence       | 2235 | 100% |
| juv | 1028 | <a href="#">EF012357.1</a> | Devosia insulae strain DS-56 16S ribosomal RNA gene, partial sequence                    | 2331 | 100% |
| juv | 1037 | <a href="#">AF164052.2</a> | Herbaspirillum sp. BA14 16S ribosomal RNA gene, partial sequence                         | 2385 | 100% |

|     |      |                            |                                                                                         |      |      |
|-----|------|----------------------------|-----------------------------------------------------------------------------------------|------|------|
| juv | 1050 | <a href="#">EU420078.1</a> | Agrobacterium rhizogenes strain Cy-0 16S ribosomal RNA gene, partial sequence           | 2322 | 100% |
| juv | 1097 | <a href="#">DQ520829.1</a> | Oxalobacteraceae bacterium NR186 16S ribosomal RNA gene, partial sequence               | 2102 | 100% |
| juv | 942  | <a href="#">HM107184.1</a> | Burkholderia sp. CCBAU 25371 16S ribosomal RNA gene, partial sequence                   | 2399 | 100% |
| mat | 23   | <a href="#">FJ390904.1</a> | Bradyrhizobium canariense strain SEMIA 928 16S ribosomal RNA gene, partial sequence     | 2326 | 100% |
| mat | 34   | <a href="#">GU201545.1</a> | Uncultured Bordetella sp. clone EFT307_A05 16S ribosomal RNA gene, partial sequence     | 2228 | 100% |
| mat | 47   | <a href="#">EU184088.1</a> | Rhizobium sp. PSB12 16S ribosomal RNA gene, partial sequence                            | 2305 | 99%  |
| mat | 54   | <a href="#">GU332616.1</a> | Duganella sp. AT1-1 16S ribosomal RNA gene, partial sequence                            | 2333 | 99%  |
| mat | 66   | <a href="#">HM438574.1</a> | Uncultured Phenylobacterium sp. clone T282G3 16S ribosomal RNA gene, partial sequence   | 2187 | 100% |
| mat | 72   | <a href="#">AF164052.2</a> | Herbaspirillum sp. BA14 16S ribosomal RNA gene, partial sequence                        | 2388 | 100% |
| mat | 74   | <a href="#">FJ390904.1</a> | Bradyrhizobium canariense strain SEMIA 928 16S ribosomal RNA gene, partial sequence     | 2326 | 100% |
| mat | 76   | <a href="#">FJ390904.1</a> | Bradyrhizobium canariense strain SEMIA 928 16S ribosomal RNA gene, partial sequence     | 2320 | 100% |
| mat | 79   | <a href="#">FJ390904.1</a> | Bradyrhizobium canariense strain SEMIA 928 16S ribosomal RNA gene, partial sequence     | 2320 | 100% |
| mat | 91   | <a href="#">AM745942.1</a> | Burkholderia sp. R-701 16S rRNA gene, strain R-701                                      | 2377 | 100% |
| mat | 95   | <a href="#">HM852118.1</a> | Rhizobium lusitanum strain P5-6 16S ribosomal RNA gene, partial sequence                | 2311 | 100% |
| mat | 148  | <a href="#">AM745942.1</a> | Burkholderia sp. R-701 16S rRNA gene, strain R-701                                      | 2407 | 100% |
| mat | 155  | <a href="#">EU184088.1</a> | Burkholderia sp. PSB12 16S ribosomal RNA gene, partial sequence                         | 2300 | 99%  |
| mat | 156  | <a href="#">HM107184.1</a> | Burkholderia sp. CCBAU 25371 16S ribosomal RNA gene, partial sequence                   | 2375 | 100% |
| mat | 161  | <a href="#">AJ865858.1</a> | Catenulispora sp. Ne06 partial 16S rRNA gene, strain Ne06                               | 2359 | 100% |
| mat | 187  | <a href="#">AM934727.1</a> | Uncultured Acidobacteria bacterium partial 16S rRNA gene, clone AMNC7                   | 2158 | 98%  |
| mat | 198  | <a href="#">DQ005909.2</a> | Telluria mixta 16S ribosomal RNA gene, partial sequence                                 | 2266 | 100% |
| mat | 207  | <a href="#">HM107185.1</a> | Burkholderia sp. s25 16S ribosomal RNA gene, partial sequence                           | 2313 | 100% |
| mat | 211  | <a href="#">FJ889346.1</a> | Uncultured Rhodanobacter sp. clone Plot18-2G04 16S ribosomal RNA gene, partial sequence | 2337 | 100% |
| mat | 212  | <a href="#">DQ005909.2</a> | Telluria mixta 16S ribosomal RNA gene, partial sequence                                 | 2266 | 100% |
| mat | 237  | <a href="#">AF408997.1</a> | Burkholderia sp. Ellin155 16S ribosomal RNA gene, partial sequence                      | 2322 | 100% |
| mat | 241  | <a href="#">GU201545.1</a> | Uncultured Bordetella sp. clone EFT307_A05 16S ribosomal RNA gene, partial sequence     | 2228 | 99%  |
| mat | 246  | <a href="#">GU201544.1</a> | Uncultured Bordetella sp. clone EFT107_D08 16S ribosomal RNA gene, partial sequence     | 1456 | 97%  |
| mat | 255  | <a href="#">FJ390904.1</a> | Bradyrhizobium canariense strain SEMIA 928 16S ribosomal RNA gene, partial sequence     | 2320 | 100% |
| mat | 261  | <a href="#">AF164052.2</a> | Herbaspirillum sp. BA14 16S ribosomal RNA gene, partial sequence                        | 2383 | 100% |
| mat | 270  | <a href="#">DQ005909.2</a> | Telluria mixta 16S ribosomal RNA gene, partial sequence                                 | 2300 | 100% |
| mat | 281  | <a href="#">AB480711.2</a> | Leptothrix sp. PN15D gene for 16S rRNA, partial sequence                                | 2348 | 100% |
| mat | 301  | <a href="#">AF408980.1</a> | Burkholderia sp. Ellin138 16S ribosomal RNA gene, partial sequence                      | 2392 | 100% |
| mat | 322  | <a href="#">HQ267096.1</a> | Ralstonia pickettii strain QL-A6 16S ribosomal RNA gene, partial sequence               | 2385 | 100% |
| mat | 337  | <a href="#">AF247494.1</a> | Burkholderia sp. S2.1 16S ribosomal RNA gene, partial sequence                          | 2377 | 100% |
| mat | 347  | <a href="#">AM745942.1</a> | Burkholderia sp. R-701 16S rRNA gene, strain R-701                                      | 2372 | 100% |

|     |     |                             |                                                                                     |                      |      |
|-----|-----|-----------------------------|-------------------------------------------------------------------------------------|----------------------|------|
| mat | 348 | <a href="#">AB531412.1</a>  | Collimonas sp. Ill-27 gene for 16S rRNA, partial sequence                           | 2372                 | 100% |
| mat | 364 | <a href="#">AF164052.2</a>  | Herbaspirillum sp. BA14 16S ribosomal RNA gene, partial sequence                    | <a href="#">2383</a> | 100% |
| mat | 368 | <a href="#">AF247494.1</a>  | Burkholderia sp. S2.1 16S ribosomal RNA gene, partial sequence                      | <a href="#">2383</a> | 100% |
| mat | 373 | <a href="#">AB480712.1</a>  | Leptothrix sp. PW10C gene for 16S rRNA, partial sequence                            | 2314                 | 100% |
| mat | 388 | <a href="#">AF247494.1</a>  | Burkholderia sp. S2.1 16S ribosomal RNA gene, partial sequence                      | <a href="#">2377</a> | 100% |
| mat | 389 | <a href="#">FJ390904.1</a>  | Bradyrhizobium canariense strain SEMIA 928 16S ribosomal RNA gene, partial sequence | 2320                 | 100% |
| mat | 401 | <a href="#">AF247494.1</a>  | Burkholderia sp. S2.1 16S ribosomal RNA gene, partial sequence                      | <a href="#">2377</a> | 100% |
| mat | 409 | <a href="#">FJ390904.1</a>  | Bradyrhizobium canariense strain SEMIA 928 16S ribosomal RNA gene, partial sequence | <a href="#">2314</a> | 100% |
| mat | 433 | <a href="#">AF408980.1</a>  | Burkholderia sp. Ellin138 16S ribosomal RNA gene, partial sequence                  | <a href="#">2381</a> | 100% |
| mat | 437 | <a href="#">AM745942.1</a>  | Burkholderia sp. R-701 16S rRNA gene, strain R-701                                  | <a href="#">2355</a> | 100% |
| mat | 438 | <a href="#">AF247494.1</a>  | Burkholderia sp. S2.1 16S ribosomal RNA gene, partial sequence                      | <a href="#">2377</a> | 100% |
| mat | 441 | <a href="#">FM202363.1</a>  | Bradyrhizobium sp. 15LBIV partial 16S rRNA gene, strain 15LBIV                      | 2326                 | 100% |
| mat | 451 | <a href="#">FJ390904.1</a>  | Bradyrhizobium canariense strain SEMIA 928 16S ribosomal RNA gene, partial sequence | <a href="#">2322</a> | 100% |
| mat | 461 | <a href="#">EU184088.1</a>  | Rhizobium sp. PSB12 16S ribosomal RNA gene, partial sequence                        | <a href="#">2311</a> | 99%  |
| mat | 475 | <a href="#">GU201545.1</a>  | Uncultured Bordetella sp. clone EFT307_A05 16S ribosomal RNA gene, partial sequence | 2239                 | 100% |
| mat | 480 | <a href="#">GQ181027.1</a>  | Burkholderia phytodimans strain LNW6 16S ribosomal RNA gene, partial sequence       | 1304                 | 95%  |
| mat | 481 | <a href="#">NR_025833.1</a> | Duganella zoogloeoides strain IAM 12670 16S ribosomal RNA, partial sequence         | 2390                 | 100% |
| mat | 485 | <a href="#">AM412138.1</a>  | Massilia sp. P-105 partial 16S rRNA gene, strain P-105                              | <a href="#">2278</a> | 100% |
| mat | 490 | <a href="#">AF247494.1</a>  | Burkholderia sp. S2.1 16S ribosomal RNA gene, partial sequence                      | <a href="#">2366</a> | 100% |
| mat | 497 | <a href="#">AF164052.2</a>  | Herbaspirillum sp. BA14 16S ribosomal RNA gene, partial sequence                    | <a href="#">2383</a> | 100% |
| mat | 521 | <a href="#">FJ390904.1</a>  | Bradyrhizobium canariense strain SEMIA 928 16S ribosomal RNA gene, partial sequence | <a href="#">2320</a> | 100% |
| mat | 532 | <a href="#">AM412138.1</a>  | Massilia sp. P-105 partial 16S rRNA gene, strain P-105                              | <a href="#">2278</a> | 100% |
| mat | 564 | <a href="#">DQ337581.1</a>  | Rhizobium sp. BBTR4 16S ribosomal RNA gene, partial sequence                        | 2305                 | 100% |
| mat | 570 | <a href="#">NR_025833.1</a> | Duganella zoogloeoides strain IAM 12670 16S ribosomal RNA, partial sequence         | <a href="#">2394</a> | 100% |
| mat | 571 | <a href="#">FJ390904.1</a>  | Bradyrhizobium canariense strain SEMIA 928 16S ribosomal RNA gene, partial sequence | <a href="#">2326</a> | 100% |
| mat | 582 | <a href="#">DQ465451.1</a>  | Burkholderia soli strain GP25-8 16S ribosomal RNA gene, partial sequence            | 2322                 | 100% |
| mat | 584 | <a href="#">AF247494.1</a>  | Burkholderia sp. S2.1 16S ribosomal RNA gene, partial sequence                      | <a href="#">2361</a> | 100% |
| mat | 585 | <a href="#">AB495150.1</a>  | Duganella zoogloeoides gene for 16S rRNA, partial sequence, strain: LB-H            | <a href="#">2364</a> | 100% |
| mat | 592 | <a href="#">EF471224.1</a>  | Dyella sp. CHNCT14 16S ribosomal RNA gene, partial sequence                         | 2398                 | 100% |
| mat | 597 | <a href="#">FJ390904.1</a>  | Bradyrhizobium canariense strain SEMIA 928 16S ribosomal RNA gene, partial sequence | <a href="#">2337</a> | 100% |
| mat | 618 | <a href="#">FJ006913.1</a>  | Kaistia sp. WPCB167 16S ribosomal RNA gene, partial sequence                        | <a href="#">2318</a> | 100% |
| mat | 621 | <a href="#">AF247494.1</a>  | Burkholderia sp. S2.1 16S ribosomal RNA gene, partial sequence                      | <a href="#">2366</a> | 100% |
| mat | 625 | <a href="#">AF408980.1</a>  | Burkholderia sp. Ellin138 16S ribosomal RNA gene, partial sequence                  | <a href="#">2374</a> | 100% |
| mat | 645 | <a href="#">HM156151.1</a>  | Caenimonas sp. TSX9-5 16S ribosomal RNA gene, partial sequence                      | 2224                 | 100% |
| mat | 646 | <a href="#">NR_029117.1</a> | Phenyllobacterium lituiforme strain Fall3 16S ribosomal RNA, partial sequence       | <a href="#">2182</a> | 100% |

|     |     |                             |                                                                                     |      |      |
|-----|-----|-----------------------------|-------------------------------------------------------------------------------------|------|------|
| mat | 648 | <a href="#">HM107185.1</a>  | Burkholderia sp. s25 16S ribosomal RNA gene, partial sequence                       | 2381 | 100% |
| mat | 683 | <a href="#">FM886840.1</a>  | Leptothrix ginsengisoli partial 16S rRNA gene, strain OTSz_A_210                    | 2228 | 100% |
| mat | 686 | <a href="#">AM412138.1</a>  | Massilia sp. P-105 partial 16S rRNA gene, strain P-105                              | 2289 | 100% |
| sen | 1   | <a href="#">HM852118.1</a>  | Rhizobium lusitanum strain P5-6 16S ribosomal RNA gene, partial sequence            | 2340 | 100% |
| sen | 10  | <a href="#">AM745942.1</a>  | Burkholderia sp. R-701 16S rRNA gene, strain R-701                                  | 2388 | 100% |
| sen | 15  | <a href="#">HM438254.1</a>  | Uncultured Bradyrhizobiaceae bacterium clone T302H7                                 | 2023 | 100% |
| sen | 16  | <a href="#">GU201545.1</a>  | Uncultured Bordetella sp. clone EFT307_A05 16S ribosomal RNA gene, partial sequence | 2239 | 100% |
| sen | 17  | <a href="#">AB586071.1</a>  | Burkholderia sp. JCM 20553 gene for 16S rRNA, partial sequence                      | 2401 | 100% |
| sen | 22  | <a href="#">HM748080.1</a>  | Dyella sp. ICB487 16S ribosomal RNA gene, partial sequence                          | 2372 | 100% |
| sen | 23  | <a href="#">AF164052.2</a>  | Herbaspirillum sp. BA14 16S ribosomal RNA gene, partial sequence                    | 2396 | 100% |
| sen | 24  | <a href="#">DQ005909.2</a>  | Telluria mixta 16S ribosomal RNA gene, partial sequence                             | 2285 | 100% |
| sen | 34  | <a href="#">AB586071.1</a>  | Burkholderia sp. JCM 20553 gene for 16S rRNA, partial sequence                      | 2390 | 100% |
| sen | 35  | <a href="#">AM745942.1</a>  | Burkholderia sp. R-701 16S rRNA gene, strain R-701                                  | 2392 | 99%  |
| sen | 36  | <a href="#">GU205281.1</a>  | Uncultured Acidobacteria bacterium clone RSC_CP1808                                 | 2076 | 99%  |
| sen | 40  | <a href="#">HQ267096.1</a>  | Ralstonia pickettii strain QL-A6 16S ribosomal RNA gene, partial sequence           | 2390 | 100% |
| sen | 41  | <a href="#">AF247494.1</a>  | Burkholderia sp. S2.1 16S ribosomal RNA gene, partial sequence                      | 2346 | 100% |
| sen | 46  | <a href="#">GU201545.1</a>  | Uncultured Bordetella sp. clone EFT307_A05 16S ribosomal RNA gene, partial sequence | 2250 | 100% |
| sen | 50  | <a href="#">AF164052.2</a>  | Herbaspirillum sp. BA14 16S ribosomal RNA gene, partial sequence                    | 2390 | 100% |
| sen | 54  | <a href="#">HQ267096.1</a>  | Ralstonia pickettii strain QL-A6 16S ribosomal RNA gene, partial sequence           | 2403 | 100% |
| sen | 55  | <a href="#">AB586071.1</a>  | Burkholderia sp. JCM 20553 gene for 16S rRNA, partial sequence                      | 2390 | 100% |
| sen | 57  | <a href="#">AF247494.1</a>  | Burkholderia sp. S2.1 16S ribosomal RNA gene, partial sequence                      | 2366 | 100% |
| sen | 59  | <a href="#">AF164052.2</a>  | Herbaspirillum sp. BA14 16S ribosomal RNA gene, partial sequence                    | 2383 | 100% |
| sen | 60  | <a href="#">AF408980.1</a>  | Burkholderia sp. Ellin138 16S ribosomal RNA gene, partial sequence                  | 2394 | 100% |
| sen | 65  | <a href="#">NR_026373.1</a> | Sphingomonas pruni strain IFO 15498 16S ribosomal RNA                               | 2309 | 100% |
| sen | 66  | <a href="#">AB586071.1</a>  | Burkholderia sp. JCM 20553 gene for 16S rRNA, partial sequence                      | 2379 | 100% |
| sen | 67  | <a href="#">AB586071.1</a>  | Burkholderia sp. JCM 20553 gene for 16S rRNA, partial sequence                      | 2396 | 100% |
| sen | 68  | <a href="#">EU420078.1</a>  | Agrobacterium rhizogenes strain Cy-0 16S ribosomal RNA gene, partial sequence       | 2340 | 100% |
| sen | 71  | <a href="#">D84645.2</a>    | Variovorax sp. S24561 gene for 16S ribosomal RNA, partial sequence                  | 2231 | 100% |
| sen | 72  | <a href="#">GU201545.1</a>  | Uncultured Bordetella sp. clone EFT307_A05 16S ribosomal RNA gene, partial sequence | 2250 | 100% |
| sen | 78  | <a href="#">AF247494.1</a>  | Burkholderia sp. S2.1 16S ribosomal RNA gene, partial sequence                      | 2374 | 100% |
| sen | 96  | <a href="#">AB586071.1</a>  | Burkholderia sp. JCM 20553 gene for 16S rRNA, partial sequence                      | 2401 | 100% |
| sen | 98  | <a href="#">EF635856.1</a>  | Burkholderia sp. LMG 22948 16S ribosomal RNA gene, partial sequence                 | 2396 | 100% |
| sen | 99  | <a href="#">EF635856.1</a>  | Burkholderia sp. LMG 22948 16S ribosomal RNA gene, partial sequence                 | 2396 | 100% |
| sen | 102 | <a href="#">AB586071.1</a>  | Burkholderia sp. JCM 20553 gene for 16S rRNA, partial sequence                      | 2396 | 100% |

|     |     |                             |                                                                                           |                      |      |
|-----|-----|-----------------------------|-------------------------------------------------------------------------------------------|----------------------|------|
| sen | 104 | <a href="#">NR_026373.1</a> | Sphingomonas pruni strain IFO 15498 16S ribosomal RNA                                     | 2314                 | 100% |
| sen | 105 | <a href="#">AB586071.1</a>  | Burkholderia sp. JCM 20553 gene for 16S rRNA, partial sequence                            | <a href="#">2396</a> | 100% |
| sen | 106 | <a href="#">AM745942.1</a>  | Burkholderia sp. R-701 16S rRNA gene, strain R-701                                        | <a href="#">2401</a> | 100% |
| sen | 107 | <a href="#">AB265148.1</a>  | Burkholderia sp. E2 gene for 16S ribosomal RNA, partial sequence                          | <a href="#">2379</a> | 100% |
| sen | 108 | <a href="#">GU201545.1</a>  | Uncultured Bordetella sp. clone EFT307_A05 16S ribosomal RNA gene, partial sequence       | <a href="#">2228</a> | 100% |
| sen | 111 | <a href="#">AY621157.2</a>  | Variovorax sp. SR516 16S ribosomal RNA gene, partial sequence                             | <a href="#">2407</a> | 100% |
| sen | 118 | <a href="#">HQ231941.1</a>  | Burkholderia sp. EW7 16S ribosomal RNA gene, partial sequence                             | <a href="#">2383</a> | 100% |
| sen | 119 | <a href="#">AM087199.1</a>  | Asticcacaulis benevestitus partial 16S rRNA gene, type strain Z-0023T                     | <a href="#">2194</a> | 100% |
| sen | 121 | <a href="#">AF247494.1</a>  | Burkholderia sp. S2.1 16S ribosomal RNA gene, partial sequence                            | <a href="#">2385</a> | 100% |
| sen | 122 | <a href="#">AF164052.2</a>  | Herbaspirillum sp. BA14 16S ribosomal RNA gene, partial sequence                          | <a href="#">2390</a> | 100% |
| sen | 123 | <a href="#">FJ605429.1</a>  | Janthinobacterium sp. PR-2 16S ribosomal RNA gene, partial sequence                       | <a href="#">2265</a> | 100% |
| sen | 124 | <a href="#">AB586071.1</a>  | Burkholderia sp. JCM 20553 gene for 16S rRNA, partial sequence                            | <a href="#">2407</a> | 100% |
| sen | 132 | <a href="#">HM062172.1</a>  | Uncultured Acidobacteria bacterium clone KBS_T1_R2_149270_d2                              | <a href="#">2263</a> | 100% |
| sen | 133 | <a href="#">AM745942.1</a>  | Burkholderia sp. R-701 16S rRNA gene, strain R-701                                        | <a href="#">2401</a> | 100% |
| sen | 136 | <a href="#">AB586071.1</a>  | Burkholderia sp. R-701 16S rRNA gene, strain R-701                                        | <a href="#">2396</a> | 100% |
| sen | 138 | <a href="#">AF247494.1</a>  | Burkholderia sp. S2.1 16S ribosomal RNA gene, partial sequence                            | <a href="#">2368</a> | 100% |
| sen | 140 | <a href="#">AJ247194.1</a>  | Asticcacaulis excentricus partial 16S rRNA gene for 16S ribosomal RNA, strain DSM 4724(T) | <a href="#">2015</a> | 100% |
| sen | 142 | <a href="#">AB586071.1</a>  | Burkholderia sp. JCM 20553 gene for 16S rRNA, partial sequence                            | <a href="#">2401</a> | 100% |
| sen | 144 | <a href="#">AM745942.1</a>  | Burkholderia sp. R-701 16S rRNA gene, strain R-701                                        | <a href="#">2388</a> | 100% |
| sen | 145 | <a href="#">DQ005909.2</a>  | Telluria mixta 16S ribosomal RNA gene, partial sequence                                   | <a href="#">2302</a> | 100% |
| sen | 146 | <a href="#">GU201545.1</a>  | Uncultured Bordetella sp. clone EFT307_A05 16S ribosomal RNA gene, partial sequence       | <a href="#">2250</a> | 100% |
| sen | 148 | <a href="#">AF247494.1</a>  | Burkholderia sp. S2.1 16S ribosomal RNA gene, partial sequence                            | <a href="#">2368</a> | 100% |
| sen | 152 | <a href="#">GU201545.1</a>  | Uncultured Bordetella sp. clone EFT307_A05 16S ribosomal RNA gene, partial sequence       | <a href="#">2239</a> | 100% |
| sen | 154 | <a href="#">AF247494.1</a>  | Burkholderia sp. S2.1 16S ribosomal RNA gene, partial sequence                            | <a href="#">2379</a> | 100% |
| sen | 155 | <a href="#">AM745942.1</a>  | Burkholderia sp. R-701 16S rRNA gene, strain R-701                                        | <a href="#">2390</a> | 100% |
| sen | 156 | <a href="#">AM745942.1</a>  | Burkholderia sp. R-701 16S rRNA gene, strain R-701                                        | <a href="#">2396</a> | 100% |
| sen | 159 | <a href="#">AF247494.1</a>  | Burkholderia sp. S2.1 16S ribosomal RNA gene, partial sequence                            | <a href="#">2368</a> | 100% |
| sen | 162 | <a href="#">AF247494.1</a>  | Burkholderia sp. S2.1 16S ribosomal RNA gene, partial sequence                            | <a href="#">2374</a> | 100% |
| sen | 163 | <a href="#">AM745942.1</a>  | Burkholderia sp. R-701 16S rRNA gene, strain R-701                                        | <a href="#">2362</a> | 100% |
| sen | 165 | <a href="#">GU201545.1</a>  | Uncultured Bordetella sp. clone EFT307_A05 16S ribosomal RNA gene, partial sequence       | <a href="#">2233</a> | 100% |
| sen | 167 | <a href="#">HM438574.1</a>  | Uncultured Phenyllobacterium sp. clone T282G3 16S ribosomal RNA gene, partial sequence    | <a href="#">2193</a> | 100% |
| sen | 169 | <a href="#">GU205281.1</a>  | Uncultured Acidobacteria bacterium clone RSC_CP1B08                                       | <a href="#">2161</a> | 99%  |
| sen | 171 | <a href="#">HM062090.1</a>  | Uncultured Acidobacteria bacterium clone KBS_T8_R3_149246_f12                             | <a href="#">2252</a> | 100% |
| sen | 172 | <a href="#">HQ222324.1</a>  | Dyella marenensis strain L2 16S ribosomal RNA gene, partial sequence                      | <a href="#">2292</a> | 100% |
| sen | 175 | <a href="#">AM745942.1</a>  | Burkholderia sp. R-701 16S rRNA gene, strain R-701                                        | <a href="#">2357</a> | 100% |

|     |     |                    |                                                                                           |      |      |
|-----|-----|--------------------|-------------------------------------------------------------------------------------------|------|------|
| sen | 178 | AM745942.1         | Burkholderia sp. R-701 16S rRNA gene, strain R-701                                        | 2385 | 100% |
| sen | 183 | <u>GU201545.1</u>  | Uncultured Bordetella sp. clone EFT307_A05 16S ribosomal RNA gene, partial sequence       | 2263 | 100% |
| sen | 188 | <u>AF164052.2</u>  | Herbaspirillum sp. BA14 16S ribosomal RNA gene, partial sequence                          | 2396 | 100% |
| sen | 190 | <u>HQ236051.1</u>  | Dyella japonica strain SBZ3-12 16S ribosomal RNA gene, partial sequence                   | 2394 | 100% |
| sen | 193 | <u>AF247494.1</u>  | Burkholderia sp. S2.1 16S ribosomal RNA gene, partial sequence                            | 2379 | 100% |
| sen | 194 | <u>FJ889346.1</u>  | Uncultured Rhodanobacter sp. clone Plot18-2G04 16S ribosomal RNA gene, partial sequence   | 2355 | 100% |
| sen | 195 | <u>DQ130042.1</u>  | Uncultured Methylobacillus sp. clone JER103 16S ribosomal RNA gene, partial sequence      | 2178 | 100% |
| sen | 209 | <u>AB265148.1</u>  | Burkholderia sp. E2 gene for 16S ribosomal RNA, partial sequence                          | 2362 | 100% |
| sen | 212 | AM745942.1         | Burkholderia sp. R-701 16S rRNA gene, strain R-701                                        | 2390 | 100% |
| sen | 217 | AM745942.1         | Burkholderia sp. R-701 16S rRNA gene, strain R-701                                        | 2379 | 100% |
| sen | 218 | <u>FJ889346.1</u>  | Uncultured Rhodanobacter sp. clone Plot18-2G04 16S ribosomal RNA gene, partial sequence   | 2348 | 99%  |
| sen | 219 | AM745942.1         | Burkholderia sp. R-701 16S rRNA gene, strain R-701                                        | 2379 | 100% |
| sen | 221 | <u>GU201545.1</u>  | Uncultured Bordetella sp. clone EFT307_A05 16S ribosomal RNA gene, partial sequence       | 2250 | 100% |
| sen | 225 | AM745942.1         | Burkholderia sp. R-701 16S rRNA gene, strain R-701                                        | 2390 | 100% |
| sen | 226 | <u>AF247494.1</u>  | Burkholderia sp. S2.1 16S ribosomal RNA gene, partial sequence                            | 2385 | 100% |
| sen | 228 | <u>GUS80894.2</u>  | Agrobacterium rubi strain F266 16S ribosomal RNA gene, partial sequence                   | 2324 | 100% |
| sen | 229 | <u>AF247494.1</u>  | Burkholderia sp. S2.1 16S ribosomal RNA gene, partial sequence                            | 2361 | 100% |
| sen | 231 | <u>GQ181055.1</u>  | Burkholderia sordidicola strain BLN20 16S ribosomal RNA gene, partial sequence            | 2394 | 100% |
| sen | 233 | <u>GU201545.1</u>  | Uncultured Bordetella sp. clone EFT307_A05 16S ribosomal RNA gene, partial sequence       | 2250 | 100% |
| sen | 235 | <u>GU201545.1</u>  | Uncultured Bordetella sp. clone EFT307_A05 16S ribosomal RNA gene, partial sequence       | 2241 | 100% |
| sen | 237 | AM745942.1         | Burkholderia sp. R-701 16S rRNA gene, strain R-701                                        | 2396 | 100% |
| sen | 238 | <u>AF408997.1</u>  | Burkholderia sp. Ellin155 16S ribosomal RNA gene, partial sequence                        | 2340 | 100% |
| sen | 240 | <u>GQ181055.1</u>  | Burkholderia sordidicola strain BLN20 16S ribosomal RNA gene, partial sequence            | 2394 | 100% |
| sen | 242 | <u>FJ889346.1</u>  | Uncultured Rhodanobacter sp. clone Plot18-2G04 16S ribosomal RNA gene, partial sequence   | 2355 | 100% |
| sen | 243 | <u>AF164052.2</u>  | Herbaspirillum sp. BA14 16S ribosomal RNA gene, partial sequence                          | 2366 | 99%  |
| sen | 244 | <u>FJ889346.1</u>  | Uncultured Rhodanobacter sp. clone Plot18-2G04 16S ribosomal RNA gene, partial sequence   | 2399 | 100% |
| sen | 245 | <u>NR_026373.1</u> | Sphingomonas pruni strain IFO 15498 16S ribosomal RNA                                     | 2320 | 100% |
| sen | 246 | <u>HM438574.1</u>  | Uncultured Phenyllobacterium sp. clone T282G3 16S ribosomal RNA gene, partial sequence    | 2215 | 100% |
| sen | 248 | <u>EU276559.1</u>  | Uncultured Rhodopseudomonas sp. clone Plot03-H12 16S ribosomal RNA gene, partial sequence | 2087 | 100% |
| sen | 251 | <u>HM107170.1</u>  | Bradyrhizobium sp. CCBAU 45281 16S ribosomal RNA gene, partial sequence                   | 2278 | 100% |
| sen | 255 | <u>FJ889346.1</u>  | Uncultured Rhodanobacter sp. clone Plot18-2G04 16S ribosomal RNA gene, partial sequence   | 2350 | 100% |
| sen | 256 | <u>HM438574.1</u>  | Uncultured Phenyllobacterium sp. clone T282G3 16S ribosomal RNA gene, partial sequence    | 2257 | 100% |
| sen | 261 | <u>HQ267096.1</u>  | Ralstonia pickettii strain QL-A6 16S ribosomal RNA gene, partial sequence                 | 2390 | 100% |
| sen | 262 | <u>HM438573.1</u>  | Uncultured Phenyllobacterium sp. clone T501 16S ribosomal RNA gene, partial sequence      | 2084 | 100% |
| sen | 263 | <u>FJ390904.1</u>  | Bradyrhizobium canariense strain SEMIA 928 16S ribosomal RNA gene, partial sequence       | 2326 | 100% |

|     |     |                            |                                                                                         |      |      |
|-----|-----|----------------------------|-----------------------------------------------------------------------------------------|------|------|
| sen | 264 | <a href="#">GU201545.1</a> | Uncultured Bordetella sp. clone EFT307_A05 16S ribosomal RNA gene, partial sequence     | 2244 | 100% |
| sen | 267 | <a href="#">AB586071.1</a> | Burkholderia sp. JCM 20553 gene for 16S rRNA, partial sequence                          | 2396 | 100% |
| sen | 268 | <a href="#">HQ222324.1</a> | Dyella marenis strain L2 16S ribosomal RNA gene, partial sequence                       | 2244 | 100% |
| sen | 270 | <a href="#">AB480712.1</a> | Leptothrix sp. PW10C gene for 16S rRNA, partial sequence                                | 2366 | 100% |
| sen | 271 | <a href="#">HQ222324.1</a> | Dyella marenis strain L2 16S ribosomal RNA gene, partial sequence                       | 2272 | 100% |
| sen | 272 | <a href="#">DQ444975.2</a> | Bacillus sp. Eur1.9.5 16S ribosomal RNA gene, partial sequence                          | 2080 | 100% |
| sen | 273 | <a href="#">FJ889346.1</a> | Uncultured Rhodanobacter sp. clone Plot18-2G04 16S ribosomal RNA gene, partial sequence | 2350 | 100% |
| sen | 278 | <a href="#">FJ889346.1</a> | Uncultured Rhodanobacter sp. clone Plot18-2G04 16S ribosomal RNA gene, partial sequence | 2355 | 100% |
| sen | 281 | <a href="#">GU201545.1</a> | Uncultured Bordetella sp. clone EFT307_A05 16S ribosomal RNA gene, partial sequence     | 2239 | 100% |
| sen | 283 | <a href="#">HQ236051.1</a> | Dyella japonica strain SBZ3-12 16S ribosomal RNA gene, partial sequence                 | 2388 | 100% |
| sen | 290 | <a href="#">AM745942.1</a> | Burkholderia sp. R-701 16S rRNA gene, strain R-701                                      | 2390 | 100% |
| sen | 292 | <a href="#">GU201545.1</a> | Uncultured Bordetella sp. clone EFT307_A05 16S ribosomal RNA gene, partial sequence     | 2244 | 100% |
| sen | 293 | <a href="#">AM745942.1</a> | Burkholderia sp. R-701 16S rRNA gene, strain R-701                                      | 2379 | 100% |
| sen | 294 | <a href="#">AF247494.1</a> | Burkholderia sp. S2.1 16S ribosomal RNA gene, partial sequence                          | 2390 | 100% |
| sen | 295 | <a href="#">GU294332.1</a> | Methylobacterium oryzae strain 1021b 16S ribosomal RNA gene, partial sequence           | 2318 | 100% |
| sen | 297 | <a href="#">FJ889346.1</a> | Uncultured Rhodanobacter sp. clone Plot18-2G04 16S ribosomal RNA gene, partial sequence | 2350 | 100% |
| sen | 299 | <a href="#">CP001043.1</a> | Burkholderia phymatum STM815 chromosome 1, complete sequence                            | 2246 | 100% |
| sen | 307 | <a href="#">AF247494.1</a> | Burkholderia sp. S2.1 16S ribosomal RNA gene, partial sequence                          | 2374 | 100% |
| sen | 308 | <a href="#">GU201545.1</a> | Uncultured Bordetella sp. clone EFT307_A05 16S ribosomal RNA gene, partial sequence     | 2239 | 100% |
| sen | 309 | <a href="#">AM745942.1</a> | Burkholderia sp. R-701 16S rRNA gene, strain R-701                                      | 2385 | 100% |
| sen | 316 | <a href="#">FJ889346.1</a> | Uncultured Rhodanobacter sp. clone Plot18-2G04 16S ribosomal RNA gene, partial sequence | 2355 | 100% |
| sen | 319 | <a href="#">AF247494.1</a> | Burkholderia sp. S2.1 16S ribosomal RNA gene, partial sequence                          | 2385 | 100% |
| sen | 321 | <a href="#">AF164052.2</a> | Herbaspirillum sp. BA14 16S ribosomal RNA gene, partial sequence                        | 2390 | 100% |
| sen | 322 | <a href="#">AF164052.2</a> | Herbaspirillum sp. BA14 16S ribosomal RNA gene, partial sequence                        | 2396 | 100% |
| sen | 324 | <a href="#">AM774587.1</a> | Maxibacter varians partial 16S rRNA gene, type strain CCG 35299T                        | 2383 | 100% |
| sen | 328 | <a href="#">AB586071.1</a> | Burkholderia sp. JCM 20553 gene for 16S rRNA, partial sequence                          | 2401 | 100% |
| sen | 329 | <a href="#">AM940946.1</a> | Asticcacaulis sp. ECN-2008 partial 16S rRNA gene                                        | 2183 | 100% |
| sen | 330 | <a href="#">AF408997.1</a> | Burkholderia sp. Ellin155 16S ribosomal RNA gene, partial sequence                      | 2340 | 100% |
